# Supplementary material for: Native habitat mitigates feast–famine conditions faced by honey bees in an agricultural landscape
Source: PubMed Central journal article supplement — Proc Natl Acad Sci U S A. 2019 Nov 25;116(50):25147–55. doi: 10.1073/pnas.1912801116 (PMC6911205; doi:10.1073/pnas.1912801116), 2019-11-25
Supplement: pnas.1912801116.sapp.pdf [file pnas.1912801116.sapp.pdf]

# PNAS

[www.pnas.org](http://www.pnas.org)

Supplementary Information for

Feast and famine in the green desert: Insights into honey bee declines in an intensively farmed agroecosystem

Adam G. Dolezal, Ashley St. Clair, Ge Zhang, Amy L. Toth, Matthew O'Neal

Corresponding author: Adam G Dolezal

Email: [adolezal@illinois.edu](mailto:adolezal@illinois.edu)

**This PDF file includes:**

Figures S1  
Tables S1 to S17

**SI Figure S1.** Measurement guide used to quantify soybean growth stage for all sites in 2015 and 2016.

## SOYBEAN GROWTH AND DEVELOPMENT

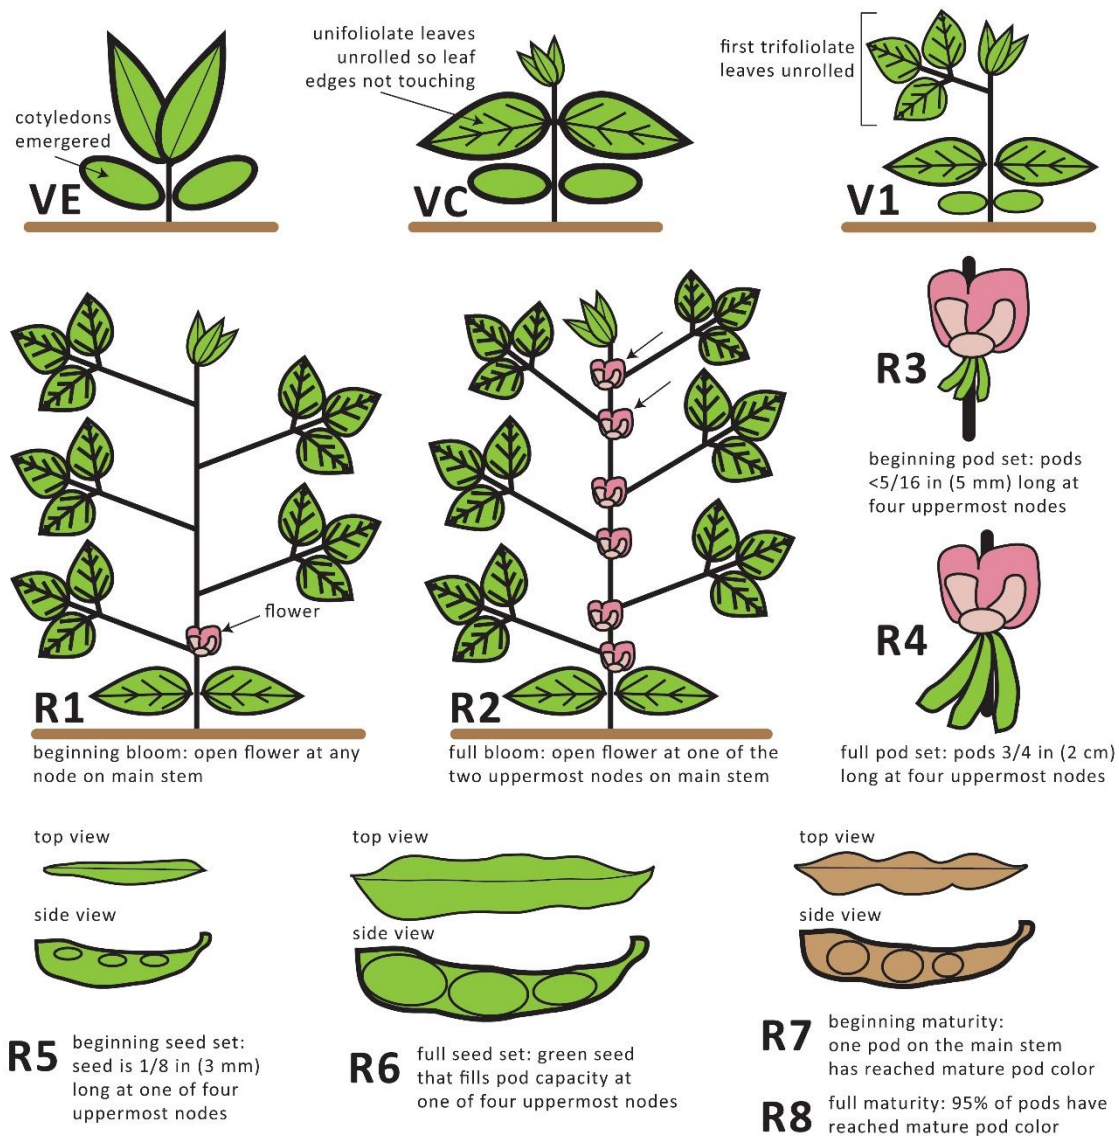

Created by Erin W. Hodgson, Iowa State University (2010)

**SI Table S1.** Iowa farms surveyed in 2015 & 2016

| Year | Site Name | Cultivation Category | County   | Percent Landuse in 1.6 km Radius of Field <sup>1</sup> |           |           |          | Farm Coordinates          |
|------|-----------|----------------------|----------|--------------------------------------------------------|-----------|-----------|----------|---------------------------|
|      |           |                      |          | Cropland                                               | Developed | Grassland | Woodland |                           |
| 2015 | JUL       | High                 | Story    | 78%                                                    | 7%        | 9%        | 6%       | 41.9648972° -93.62951389° |
| 2015 | OFAR      | High                 | Marshall | 75%                                                    | 6%        | 17%       | 2%       | 42.033889° -93.0285389°   |
| 2015 | WDAI      | High                 | Story    | 88%                                                    | 8%        | 4%        | 0%       | 41.97079167° -93.658989°  |
| 2015 | GLI       | High                 | Marshall | 93%                                                    | 5%        | 2%        | 0%       | 42.145356° -93.1175°      |
| 2015 | LIPP      | High                 | Boone    | 74%                                                    | 8%        | 11%       | 7%       | 42.0476361° -93.72373889° |
| 2015 | LIOP      | Low                  | Marshall | 44%                                                    | 21%       | 27%       | 8%       | 42.0072472° -92.9658083°  |
| 2015 | CAT       | Low                  | Story    | 56%                                                    | 9%        | 15%       | 20%      | 42.0583167° -93.68207778° |
| 2015 | CURT      | Low                  | Story    | 30%                                                    | 31%       | 21%       | 19%      | 42.00281° -93.6715194°    |
| 2015 | HOR       | Low                  | Story    | 44%                                                    | 5%        | 26%       | 25%      | 42.1069694° -93.5810972°  |
| 2015 | IARIV     | Low                  | Marshall | 55%                                                    | 5%        | 19%       | 20%      | 42.1402083° -93.04970278° |
| 2016 | OAK       | High                 | Story    | 91%                                                    | 5%        | 3%        | 0%       | 41.929764° -93.639831°    |
| 2016 | IVI       | High                 | Boone    | 93%                                                    | 5%        | 3%        | 0%       | 41.994122° -93.751983°    |
| 2016 | TRA1      | High                 | Boone    | 79%                                                    | 4%        | 16%       | 1%       | 42.137892° -93.831206°    |
| 2016 | EDAI      | High                 | Story    | 82%                                                    | 8%        | 10%       | 1%       | 41.972141° -93.629994°    |
| 2016 | UTH       | High                 | Story    | 87%                                                    | 3%        | 9%        | 1%       | 41.921955° -93.747422°    |
| 2016 | KOST      | Low                  | Boone    | 13%                                                    | 29%       | 15%       | 43%      | 42.050572° -93.918092°    |
| 2016 | HAG       | Low                  | Story    | 52%                                                    | 4%        | 13%       | 32%      | 42.090914° -94.011750°    |
| 2016 | CURT      | Low                  | Story    | 27%                                                    | 34%       | 20%       | 19%      | 42.003816° -93.668273°    |
| 2016 | TRA3      | Low                  | Boone    | 50%                                                    | 6%        | 14%       | 29%      | 42.123217° -93.912994°    |
| 2016 | ONT       | Low                  | Story    | 12%                                                    | 46%       | 11%       | 31%      | 42.037406° -93.665611°    |

<sup>1</sup>Landscape categories based on individual features of landscape listed in table 2.

**SI Table S2.** Individual landscape features surrounding soybean farms within a 1.6 km buffer in Iowa in 2015 and 2016.

| Site | Year | Cultivation Category | Sweet  |          |       |       |       |         |       |             |                    |             | Open  | Developed open space | Developed low intensity | Developed med intensity |        |
|------|------|----------------------|--------|----------|-------|-------|-------|---------|-------|-------------|--------------------|-------------|-------|----------------------|-------------------------|-------------------------|--------|
|      |      |                      | Corn   | Soybeans | Corn  | Rye   | Oats  | Alfalfa | Hay   | Other Crops | Wildflower /Clover | Fallow crop |       |                      |                         |                         | Apples |
| JUL  | 2015 | High                 | 43.77% | 32.96%   | 0.00% | 0.00% | 0.05% | 0.69%   | 0.43% | 0.00%       | 0.00%              | 0.00%       | 0.00% | 0.13%                | 5.53%                   | 0.96%                   | 0.48%  |
| OLD  | 2015 | High                 | 46.92% | 26.87%   | 0.00% | 0.00% | 0.07% | 0.58%   | 0.22% | 0.00%       | 0.00%              | 0.00%       | 0.00% | 0.00%                | 5.59%                   | 0.74%                   | 0.08%  |
| WDA  | 2015 | High                 | 56.08% | 31.20%   | 0.00% | 0.00% | 0.34% | 0.47%   | 0.07% | 0.00%       | 0.00%              | 0.01%       | 0.00% | 0.00%                | 5.35%                   | 0.96%                   | 0.99%  |
| GLI  | 2015 | High                 | 40.24% | 52.55%   | 0.00% | 0.00% | 0.00% | 0.17%   | 0.00% | 0.00%       | 0.00%              | 0.00%       | 0.00% | 5.17%                | 0.02%                   | 0.02%                   |        |
| LIP  | 2015 | High                 | 53.46% | 19.89%   | 0.00% | 0.00% | 0.00% | 0.08%   | 0.08% | 0.00%       | 0.00%              | 0.00%       | 0.18% | 6.34%                | 0.85%                   | 0.23%                   |        |
| LPA  | 2015 | Low                  | 28.72% | 14.49%   | 0.00% | 0.00% | 0.00% | 0.54%   | 0.26% | 0.00%       | 0.00%              | 0.00%       | 0.54% | 14.40%               | 4.10%                   | 1.72%                   |        |
| CAT  | 2015 | Low                  | 18.45% | 31.99%   | 0.04% | 0.00% | 0.05% | 2.26%   | 3.22% | 0.01%       | 0.00%              | 0.01%       | 0.23% | 7.05%                | 1.65%                   | 0.12%                   |        |
| CUR  | 2015 | Low                  | 11.72% | 12.91%   | 0.01% | 0.00% | 0.22% | 2.62%   | 2.26% | 0.02%       | 0.04%              | 0.01%       | 0.41% | 14.04%               | 7.67%                   | 6.77%                   |        |
| HOR  | 2015 | Low                  | 18.01% | 24.58%   | 0.00% | 0.00% | 0.01% | 0.41%   | 0.49% | 0.00%       | 0.00%              | 0.00%       | 1.60% | 3.08%                | 0.54%                   | 0.02%                   |        |
| IRIV | 2015 | Low                  | 25.03% | 28.44%   | 0.00% | 0.00% | 0.88% | 0.29%   | 0.07% | 0.00%       | 0.01%              | 0.00%       | 2.41% | 2.91%                | 0.11%                   | 0.00%                   |        |
| OAK  | 2016 | High                 | 60.70% | 29.07%   | 0.00% | 0.00% | 0.16% | 0.53%   | 0.63% | 0.00%       | 0.00%              | 0.00%       | 0.00% | 4.91%                | 0.24%                   | 0.11%                   |        |
| IVI  | 2016 | High                 | 53.28% | 39.53%   | 0.00% | 0.00% | 0.00% | 0.02%   | 0.00% | 0.00%       | 0.00%              | 0.00%       | 0.00% | 4.32%                | 0.19%                   | 0.02%                   |        |
| TRA  | 2016 | High                 | 49.46% | 25.11%   | 0.00% | 0.00% | 0.08% | 1.60%   | 3.14% | 0.01%       | 0.01%              | 0.00%       | 0.02% | 3.63%                | 0.06%                   | 0.00%                   |        |
| EDAI | 2016 | High                 | 46.52% | 34.09%   | 0.00% | 0.01% | 0.07% | 0.40%   | 0.49% | 0.00%       | 0.00%              | 0.00%       | 0.17% | 5.48%                | 1.35%                   | 0.93%                   |        |
| UTH  | 2016 | High                 | 50.78% | 35.84%   | 0.01% | 0.00% | 0.00% | 0.08%   | 0.18% | 0.00%       | 0.00%              | 0.05%       | 0.00% | 3.25%                | 0.12%                   | 0.04%                   |        |
| KOS  | 2016 | Low                  | 6.47%  | 5.36%    | 0.00% | 0.00% | 0.05% | 0.35%   | 0.58% | 0.01%       | 0.00%              | 0.00%       | 1.29% | 16.96%               | 9.22%                   | 0.94%                   |        |
| HAG  | 2016 | Low                  | 30.65% | 17.87%   | 0.00% | 0.00% | 0.37% | 0.98%   | 1.63% | 0.00%       | 0.00%              | 0.00%       | 0.34% | 3.50%                | 0.14%                   | 0.00%                   |        |
| CUR  | 2016 | Low                  | 8.56%  | 12.44%   | 0.01% | 0.00% | 0.22% | 3.29%   | 2.45% | 0.02%       | 0.04%              | 0.07%       | 0.30% | 16.93%               | 8.41%                   | 6.71%                   |        |
| TRA  | 2016 | Low                  | 32.15% | 17.71%   | 0.00% | 0.00% | 0.00% | 0.54%   | 0.02% | 0.00%       | 0.00%              | 0.00%       | 0.01% | 6.21%                | 0.14%                   | 0.00%                   |        |
| ONT  | 2016 | Low                  | 6.44%  | 4.42%    | 0.00% | 0.00% | 0.00% | 0.89%   | 0.20% | 0.04%       | 0.00%              | 0.00%       | 0.00% | 21.65%               | 17.94%                  | 5.19%                   |        |
| HOR  | 2015 | Ag Site              | 18.01% | 24.58%   | 0.00% | 0.00% | 0.01% | 0.41%   | 0.49% | 0.00%       | 0.00%              | 0.00%       | 1.60% | 3.08%                | 0.54%                   | 0.02%                   |        |
| SAN  | 2016 | Prairie              | 29.12% | 7.15%    | 0.00% | 0.00% | 0.00% | 0.36%   | 1.23% | 0.00%       | 0.00%              | 0.00%       | 1.17% | 11.09%               | 0.74%                   | 0.01%                   |        |

Land use surrounding each farm was quantified in ArcGIS, ArcMap 10.3.1 using a 1.6 km radius centered on the apiary location. Land use features were based on the USDA-NASS cropland data layer for 2015 and 2016 at a 30 m x 30 m resolution (<https://nassgeodata.gmu.edu/CropScape/>). Using the 'isecpolyrst' function in Geospatial Modeling Environment (Version 0.7.4.0) the proportion of all landscape feature classes were identified by counting pixels associated with each land category (SI Table S2).

**SI Table S3.** Land use classifications combined to create four land use<sup>1</sup> categories in 2015 & 2016.

| <b>Cropland</b> | <b>Developed</b>           | <b>Grassland</b>  | <b>Woodland</b>    |
|-----------------|----------------------------|-------------------|--------------------|
| Soybean         | Open Water                 | Clover/Wildflower | Deciduous Forest   |
| Corn            | Developed Open Space       | Fallow Crop       | Evergreen Forest   |
| Sweet Corn      | Developed Low Intensity    | Grass/Pasture     | Mixed Forest       |
| Rye             | Developed Medium Intensity |                   | Shrub land         |
| Oats            | Developed High Intensity   |                   | Woody Wetland      |
| Alfalfa         | Barren                     |                   | Herbaceous Wetland |
| Other Hay       |                            |                   | Apples             |
| Other Crops     |                            |                   |                    |

<sup>1</sup>Land use features were based on the USDA-NASS cropland data layer for 2015 and 2016 within a 1.6 km radius of each soybean farm.

**SI Table S4.** Mite load and queen presence as fixed factors in 2015 & 2016.

|                                | <b>Mite Load<sup>1</sup></b> |          |         | <b>Queen Presence<sup>2</sup></b> |          |         |
|--------------------------------|------------------------------|----------|---------|-----------------------------------|----------|---------|
|                                | F                            | Df       | p-value | F                                 | Df       | p-value |
| <b>Mass</b>                    | 0.84                         | 1, 38.05 | 0.3638  | 0.12                              | 4, 37.78 | 0.9746  |
| <b>Immature bee population</b> | 0.34                         | 1, 38    | 0.5638  | 0.41                              | 4, 37.45 | 0.7968  |
| <b>Adult bee population</b>    | 0.1                          | 1, 25.97 | 0.7566  | 0.28                              | 4, 23.92 | 0.8886  |

<sup>1</sup>Mites per 300 bees as measured monthly during 2015 and 2016

<sup>2</sup>Queen presence is measured as binary 1 (present) and 0 (absent) at each inspection in 2015 and 2016

**SI Table S5.** Simple effect comparisons of interaction between cultivation category and sampling week least squares means for apiary mass in 2015 and 2016. Adjustment for multiple comparisons: Tukey-Kramer

| Simple Effect Level | Cultivation Category | Cultivation Category | Estimate | Standard Error | DF    | t Value | Pr >  t | Adj P  |
|---------------------|----------------------|----------------------|----------|----------------|-------|---------|---------|--------|
| Week 22             | Low Cultivation      | High Cultivation     | 2.2116   | 2.7961         | 79.58 | 0.79    | 0.4313  | 0.4304 |
| Week 24             | Low Cultivation      | High Cultivation     | -0.2988  | 2.2546         | 43.3  | -0.13   | 0.8952  | 0.8948 |
| Week 26             | Low Cultivation      | High Cultivation     | -2.8491  | 2.7961         | 79.58 | -1.02   | 0.3113  | 0.3102 |
| Week 27             | Low Cultivation      | High Cultivation     | -0.9209  | 2.7961         | 79.58 | -0.33   | 0.7428  | 0.7424 |
| Week 28             | Low Cultivation      | High Cultivation     | -3.4988  | 2.2546         | 43.3  | -1.55   | 0.1280  | 0.1232 |
| Week 30             | Low Cultivation      | High Cultivation     | -3.9157  | 2.2546         | 43.3  | -1.74   | 0.0895  | 0.0848 |
| Week 32             | Low Cultivation      | High Cultivation     | -9.3333  | 2.2546         | 43.3  | -4.14   | 0.0002  | <.0001 |
| Week 34             | Low Cultivation      | High Cultivation     | -7.7574  | 2.7961         | 79.58 | -2.77   | 0.0069  | 0.0064 |
| Week 36             | Low Cultivation      | High Cultivation     | -7.3504  | 2.7961         | 79.58 | -2.63   | 0.0103  | 0.0096 |
| Week 38             | Low Cultivation      | High Cultivation     | -7.8591  | 2.7961         | 79.58 | -2.81   | 0.0062  | 0.0057 |
| Week 39             | Low Cultivation      | High Cultivation     | -3.7749  | 2.7961         | 79.58 | -1.35   | 0.1808  | 0.1794 |
| Week 42             | Low Cultivation      | High Cultivation     | -3.8926  | 2.7961         | 79.58 | -1.39   | 0.1678  | 0.1663 |
| Week 43             | Low Cultivation      | High Cultivation     | -5.5410  | 2.7961         | 79.58 | -1.98   | 0.0510  | 0.0497 |

**SI Table S6.** Simple effect comparisons of interaction between cultivation category and sampling week least squares means for apiary immature bee population (i.e. Brood) in 2015 and 2016. Adjustment for multiple comparisons: Tukey-Kramer

| Simple Effect Level | Cultivation Category | Cultivation Category | Estimate | Standard Error | DF    | t Value | Pr >  t |
|---------------------|----------------------|----------------------|----------|----------------|-------|---------|---------|
| Week 22             | Low Cultivation      | High Cultivation     | 3.5952   | 57.7091        | 122.1 | 0.06    | 0.9504  |
| Week 24             | Low Cultivation      | High Cultivation     | -3.2992  | 57.7091        | 122.1 | -0.06   | 0.9545  |
| Week 26             | Low Cultivation      | High Cultivation     | 7.2962   | 57.7091        | 122.1 | 0.13    | 0.8996  |
| Week 27             | Low Cultivation      | High Cultivation     | -26.9660 | 57.7091        | 122.1 | -0.47   | 0.6411  |
| Week 28             | Low Cultivation      | High Cultivation     | -47.8189 | 41.9798        | 95.58 | -1.14   | 0.2575  |
| Week 30             | Low Cultivation      | High Cultivation     | -99.8669 | 41.9798        | 95.58 | -2.38   | 0.0194  |
| Week 32             | Low Cultivation      | High Cultivation     | -28.4920 | 41.9798        | 95.58 | -0.68   | 0.4990  |
| Week 34             | Low Cultivation      | High Cultivation     | -71.2019 | 57.7091        | 122.1 | -1.23   | 0.2196  |
| Week 36             | Low Cultivation      | High Cultivation     | -183.90  | 57.7091        | 122.1 | -3.19   | 0.0018  |
| Week 38             | Low Cultivation      | High Cultivation     | -54.8881 | 57.7091        | 122.1 | -0.95   | 0.3434  |
| Week 39             | Low Cultivation      | High Cultivation     | -88.7360 | 57.7091        | 122.1 | -1.54   | 0.1267  |
| Week 42             | Low Cultivation      | High Cultivation     | -18.3270 | 57.7091        | 122.1 | -0.32   | 0.7513  |
| Week 43             | Low Cultivation      | High Cultivation     | -0.3410  | 57.7091        | 122.1 | -0.01   | 0.9953  |



**SI Table S7.** Simple effect comparisons of interaction between cultivation category and sampling week least squares means for apiary adult bee population in 2016. Adjustment for multiple comparisons: Tukey-Kramer

| <b>Simple Effect Level</b> | <b>Cultivation Category</b> | <b>Cultivation Category</b> | <b>Estimate</b> | <b>Standard Error</b> | <b>DF</b> | <b>t Value</b> | <b>Pr &gt;  t </b> | <b>Adj P</b> |
|----------------------------|-----------------------------|-----------------------------|-----------------|-----------------------|-----------|----------------|--------------------|--------------|
| Week 22                    | Low Cultivation             | High Cultivation            | 0.8500          | 3.3249                | 23.84     | 0.26           | 0.8004             | 0.7990       |
| Week 24                    | Low Cultivation             | High Cultivation            | -0.3000         | 3.3249                | 23.84     | -0.09          | 0.9289             | 0.9284       |
| Week 27                    | Low Cultivation             | High Cultivation            | -3.4250         | 3.3249                | 23.84     | -1.03          | 0.3133             | 0.3064       |
| Week 28                    | Low Cultivation             | High Cultivation            | -3.9000         | 3.3249                | 23.84     | -1.17          | 0.2524             | 0.2447       |
| Week 30                    | Low Cultivation             | High Cultivation            | -3.4000         | 3.3249                | 23.84     | -1.02          | 0.3168             | 0.3099       |
| Week 32                    | Low Cultivation             | High Cultivation            | -15.9250        | 3.3249                | 23.84     | -4.79          | <.0001             | <.0001       |
| Week 34                    | Low Cultivation             | High Cultivation            | -14.2000        | 3.3249                | 23.84     | -4.27          | 0.0003             | <.0001       |
| Week 36                    | Low Cultivation             | High Cultivation            | -8.5750         | 3.3249                | 23.84     | -2.58          | 0.0165             | 0.0120       |
| Week 39                    | Low Cultivation             | High Cultivation            | -9.2000         | 3.3249                | 23.84     | -2.77          | 0.0108             | 0.0072       |
| Week 43                    | Low Cultivation             | High Cultivation            | -5.5250         | 3.3249                | 23.84     | -1.66          | 0.1097             | 0.1009       |

**SI Table S8.** Type III fixed effects of continuous measures of landscape on apiary weight, immature bee population, and adult bee population in 2015 and 2016.

| Effect     | Weight (Kg) |        |         |        | Immature bee population |        |         |        | Adult bee population |        |         |        |
|------------|-------------|--------|---------|--------|-------------------------|--------|---------|--------|----------------------|--------|---------|--------|
|            | Num DF      | Den DF | F Value | Pr > F | Num DF                  | Den DF | F Value | Pr > F | Num DF               | Den DF | F Value | Pr > F |
| Grassland  | 1           | 17.5   | 0.01    | 0.939  | 1                       | 18.6   | 0.13    | 0.7202 | 1                    | 6      | 0.65    | 0.4524 |
| Woodland   | 1           | 15.9   | 5.27    | 0.0356 | 1                       | 15.7   | 0.19    | 0.6675 | 1                    | 6      | 3.47    | 0.1117 |
| Developed  | 1           | 15.4   | 0       | 0.9704 | 1                       | 14.7   | 0.59    | 0.4557 | 1                    | 6      | 0.23    | 0.6478 |
| Week       | 12          | 103    | 11.78   | <.0001 | 12                      | 93.5   | 4.69    | <.0001 | 9                    | 54     | 16.42   | <.0001 |
| Year       | 1           | 17.4   | 1.44    | 0.2463 | 1                       | 27.9   | 3.94    | 0.0571 | .                    | .      | .       | .      |
| Grassland* | 12          | 104    | 0.26    | 0.9942 | 12                      | 92.4   | 0.44    | 0.9421 | 9                    | 54     | 1.35    | 0.2335 |
| Week       | 12          | 103    | 2.93    | 0.0016 | 12                      | 94.3   | 0.55    | 0.8778 | 9                    | 54     | 2.19    | 0.0368 |
| Woodland*  | 12          | 103    | 0.27    | 0.992  | 12                      | 94     | 0.55    | 0.8751 | 9                    | 54     | 1.03    | 0.4254 |
| Week       | 12          | 103    | 0.27    | 0.992  | 12                      | 94     | 0.55    | 0.8751 | 9                    | 54     | 1.03    | 0.4254 |
| Developed* | 12          | 103    | 0.27    | 0.992  | 12                      | 94     | 0.55    | 0.8751 | 9                    | 54     | 1.03    | 0.4254 |
| Week       | 12          | 103    | 0.27    | 0.992  | 12                      | 94     | 0.55    | 0.8751 | 9                    | 54     | 1.03    | 0.4254 |
| Cropland   | 1           | 17.5   | 5.84    | 0.0268 | 1                       | 17.5   | 3.62    | 0.0735 | 1                    | 8      | 5.15    | 0.0529 |
| Week       | 12          | 128    | 1.92    | 0.0375 | 12                      | 119    | 3.15    | 0.0006 | 9                    | 72     | 3.12    | 0.0032 |
| Year       | 1           | 20.6   | 1.1     | 0.3059 | 1                       | 34.7   | 3.91    | 0.0561 | .                    | .      | .       | .      |
| Cropland*  | 12          | 128    | 2.7     | 0.0028 | 12                      | 118    | 1.71    | 0.0734 | 9                    | 72     | 6.31    | <.0001 |
| Week       | 12          | 128    | 2.7     | 0.0028 | 12                      | 118    | 1.71    | 0.0734 | 9                    | 72     | 6.31    | <.0001 |

Grassland, Woodland, and Developed were all ran in one model while cropland was ran in a separate model due to collinearity of landscape features.

Adult bee population was measured in 2016 only

**SI Table S9.** Simple effect comparisons of interaction between cultivation category and sampling week least squares means for apiary nurse bee lipid percent in 2015 and 2016. Adjustment for multiple comparisons: Tukey-Kramer

| <b>Simple Effect Level</b> | <b>Cultivation Category</b> | <b>Cultivation Category</b> | <b>Estimate</b> | <b>Standard Error</b> | <b>DF</b> | <b>t Value</b> | <b>Pr &gt;  t </b> | <b>Adj P</b> |
|----------------------------|-----------------------------|-----------------------------|-----------------|-----------------------|-----------|----------------|--------------------|--------------|
| Week 24                    | Low Cultivation             | High Cultivation            | -0.1828         | 0.2858                | 69        | -0.64          | 0.5246             | 0.5246       |
| Week 28                    | Low Cultivation             | High Cultivation            | 0.2410          | 0.2858                | 69        | 0.84           | 0.4021             | 0.4021       |
| Week 32                    | Low Cultivation             | High Cultivation            | -0.2712         | 0.4042                | 69        | -0.67          | 0.5046             | 0.5046       |
| Week 34                    | Low Cultivation             | High Cultivation            | -0.4791         | 0.4042                | 69        | -1.19          | 0.2400             | 0.2400       |
| Week 43                    | Low Cultivation             | High Cultivation            | -0.1623         | 0.2858                | 69        | -0.57          | 0.5720             | 0.5720       |

**SI Table S10.** Differences of least squares means for apiary nurse bee lipid content between weeks in 2015 and 2016.

| Week | Week | Estimate | SE     | DF | t Value | Pr >  t | Adj P            |
|------|------|----------|--------|----|---------|---------|------------------|
| 24   | 28   | 1.0074   | 0.2021 | 69 | 4.98    | <.0001  | <b>&lt;.0001</b> |
| 24   | 32   | 1.2566   | 0.2609 | 69 | 4.82    | <.0001  | <b>&lt;.0001</b> |
| 24   | 34   | 1.1298   | 0.2609 | 69 | 4.33    | <.0001  | <b>0.0005</b>    |
| 24   | 43   | 1.8425   | 0.2021 | 69 | 9.12    | <.0001  | <b>&lt;.0001</b> |
| 28   | 32   | 0.2492   | 0.2609 | 69 | 0.96    | 0.3429  | 0.874            |
| 28   | 34   | 0.1224   | 0.2609 | 69 | 0.47    | 0.6405  | 0.9899           |
| 28   | 43   | 0.835    | 0.2021 | 69 | 4.13    | <.0001  | 0.0009           |
| 32   | 34   | -0.1268  | 0.3301 | 69 | -0.38   | 0.702   | <b>0.9953</b>    |
| 32   | 43   | 0.5858   | 0.2609 | 69 | 2.25    | 0.028   | 0.1757           |
| 34   | 43   | 0.7126   | 0.2609 | 69 | 2.73    | 0.008   | 0.0595           |

**SI Table S11.** Rates of apiary growth and decline in high and low cultivation in 2015 and 2016.

|                         | Cultivation Category                | Rate Comparison              | Estimate | Standard Error | DF    | t Value | Pr >  t |
|-------------------------|-------------------------------------|------------------------------|----------|----------------|-------|---------|---------|
| Weight                  | High Cultivation                    | Rate of gain vs Rate of loss | -0.9414  | 1.8966         | 592.8 | -0.5    | 0.6198  |
|                         | Low Cultivation                     | Rate of gain vs Rate of loss | 0.763    | 1.8966         | 592.8 | 0.4     | 0.6876  |
|                         | Low Cultivation vs High Cultivation | Rate of gain                 | -5.5938  | 2.0978         | 594   | -2.67   | 0.0079  |
|                         | Low Cultivation vs High Cultivation | Rate of Loss                 | 3.8893   | 1.6025         | 591.7 | 2.43    | 0.0155  |
|                         |                                     |                              |          |                |       |         |         |
| Immature bee population | High Cultivation                    | Rate of gain vs Rate of loss | -56.47   | 46.739         | 553   | -1.21   | 0.2275  |
|                         | Low Cultivation                     | Rate of gain vs Rate of loss | -32.728  | 46.739         | 553   | -0.7    | 0.4841  |
|                         | Low Cultivation vs High Cultivation | Rate of gain                 | -87.433  | 51.571         | 556   | -1.7    | 0.0906  |
|                         | Low Cultivation vs High Cultivation | Rate of Loss                 | 63.691   | 39.447         | 550.2 | 1.61    | 0.107   |
|                         |                                     |                              |          |                |       |         |         |
|                         |                                     |                              |          |                |       |         |         |
| Adult bee population    | High Cultivation                    | Rate of gain vs Rate of loss | -2.8458  | 2.1949         | 350   | -1.3    | 0.1956  |
|                         | Low Cultivation                     | Rate of gain vs Rate of loss | 0.02917  | 2.1949         | 350   | 0.01    | 0.9894  |
|                         | Low Cultivation vs High Cultivation | Rate of gain                 | -4.5     | 2.2585         | 350   | -1.99   | 0.0471  |
|                         | Low Cultivation vs High Cultivation | Rate of Loss                 | 7.375    | 2.1294         | 350   | 3.46    | 0.0006  |
|                         |                                     |                              |          |                |       |         |         |

Rate of gain calculated from colony initiation to peak weight, weeks ( ) May, June, and July

Rate of loss calculated from peak weight to the end of the season, weeks ( ) August, September, October.

**SI Table S12.** Differences of least squares means for colony pollen collection type in high and low cultivation landscapes in 2015 and 2016.

| Cultivation Category | Pollen Type   | Cultivation Category | Pollen Type   | Estimate | DF    | t Value | Pr >  t | Adj P        |
|----------------------|---------------|----------------------|---------------|----------|-------|---------|---------|--------------|
| High                 | Clover        | High                 | Partridge Pea | 67.2209  | 36    | 4.03    | 0.0003  | <b>0.003</b> |
| High                 | Clover        | High                 | Trace         | 67.5546  | 36    | 4.05    | 0.0003  | <b>0.003</b> |
| High                 | Clover        | Low                  | Clover        | 12.0419  | 51.14 | 0.68    | 0.4997  | 0.983        |
| High                 | Clover        | Low                  | Partridge Pea | 55.1787  | 51.14 | 3.12    | 0.003   | <b>0.039</b> |
| High                 | Clover        | Low                  | Trace         | 75.7701  | 51.14 | 4.28    | <.0001  | <b>0.002</b> |
| High                 | Partridge Pea | High                 | Trace         | 0.3338   | 36    | 0.02    | 0.9841  | 1            |
| High                 | Partridge Pea | Low                  | Clover        | -55.179  | 51.14 | -3.12   | 0.003   | <b>0.039</b> |
| High                 | Partridge Pea | Low                  | Partridge Pea | -12.0422 | 51.14 | -0.68   | 0.4997  | 0.983        |
| High                 | Partridge Pea | Low                  | Trace         | 8.5492   | 51.14 | 0.48    | 0.6314  | 0.997        |
| High                 | Trace         | Low                  | Clover        | -55.5128 | 51.14 | -3.13   | 0.0029  | <b>0.037</b> |
| High                 | Trace         | Low                  | Partridge Pea | -12.3759 | 51.14 | -0.7    | 0.4879  | 0.981        |
| High                 | Trace         | Low                  | Trace         | 8.2155   | 51.14 | 0.46    | 0.6447  | 0.997        |
| Low                  | Clover        | Low                  | Partridge Pea | 43.1368  | 36    | 2.59    | 0.0138  | 0.126        |
| Low                  | Clover        | Low                  | Trace         | 63.7282  | 36    | 3.82    | 0.0005  | <b>0.006</b> |
| Low                  | Partridge Pea | Low                  | Trace         | 20.5914  | 36    | 1.24    | 0.2246  | 0.817        |

**SI Table S13.** Pollen grains identified in honey sampled from colonies biweekly throughout soybean bloom in 2016.

| Week | Percent Soybean Fields Blooming | Cultivation Category | Total pollen pellets sampled | Mean percent pollen found in honey |                   |         |                                                            |
|------|---------------------------------|----------------------|------------------------------|------------------------------------|-------------------|---------|------------------------------------------------------------|
|      |                                 |                      |                              | Red+white clover                   | Birdsfoot trefoil | Soybean | Rest (including 8 minor species and other unknown species) |
| 28   | 100                             | High Cultivation     | 1500                         | 38.93%                             | 3.73%             | 0.40%   | 57.33%                                                     |
| 30   | 100                             | High Cultivation     | 1500                         | 61.93%                             | 22.73%            | 0.00%   | 15.33%                                                     |
| 32   | 100                             | High Cultivation     | 1100                         | 52.53%                             | 17.53%            | 0.73%   | 29.93%                                                     |
| 34   | 0                               | High Cultivation     | 720                          | 36.50%                             | 5.25%             | 0.33%   | 58.25%                                                     |
| 28   | 100                             | Low Cultivation      | 1500                         | 25.67%                             | 1.20%             | 0.00%   | 73.13%                                                     |
| 30   | 100                             | Low Cultivation      | 1500                         | 40.87%                             | 4.53%             | 0.20%   | 54.60%                                                     |
| 32   | 100                             | Low Cultivation      | 1200                         | 50.83%                             | 0.92%             | 0.08%   | 48.25%                                                     |
| 34   | 0                               | Low Cultivation      | 860                          | 23.00%                             | 11.08%            | 0.79%   | 65.92%                                                     |

**SI Table S14.** Growth stage<sup>1</sup> of each apiary soybean farm in 2015 and 2016.

| Year | Site Name | Cultivation Category | Calender week |    |    |    |    |    |    |
|------|-----------|----------------------|---------------|----|----|----|----|----|----|
|      |           |                      | 22            | 24 | 26 | 28 | 30 | 32 | 34 |
| 2015 | JUL       | High                 | .             | V2 | V4 | R1 | R2 | R3 | .  |
| 2015 | OFAR      | High                 | .             | V3 | R1 | R2 | R3 | R4 | .  |
| 2015 | WDAI      | High                 | .             | V3 | R1 | R2 | R3 | R4 | .  |
| 2015 | GLI       | High                 | .             | V3 | R1 | R2 | R3 | R4 | .  |
| 2015 | LIPP      | High                 | .             | V1 | V3 | R1 | R2 | R4 | .  |
| 2015 | LIOP      | Low                  | .             | V1 | V4 | R1 | R2 | R3 | .  |
| 2015 | CAT       | Low                  | .             | V3 | V5 | R1 | R2 | R4 | .  |
| 2015 | CURT      | Low                  | .             | V4 | R1 | R2 | R3 | R4 | .  |
| 2015 | HOR       | Low                  | .             | V5 | R1 | R2 | R3 | R4 | .  |
| 2015 | IARIV     | Low                  | .             | V1 | V3 | R1 | R3 | R4 | .  |
| 2016 | OAK       | High                 | VE            | V2 | R1 | R2 | R3 | R4 | R5 |
| 2016 | IVI       | High                 | VE            | V1 | V3 | R1 | R3 | R4 | R5 |
| 2016 | TRA1      | High                 | VE            | V1 | R1 | R2 | R3 | R4 | R5 |
| 2016 | EDAI      | High                 | VC            | V4 | R1 | R1 | R3 | R4 | R5 |
| 2016 | UTH       | High                 | VE            | VC | V3 | R2 | R3 | R4 | R5 |
| 2016 | KOST      | Low                  | VE            | VC | R1 | R2 | R3 | R4 | R5 |
| 2016 | HAG       | Low                  | VC            | V1 | R1 | R2 | R3 | R4 | R5 |
| 2016 | CURT      | Low                  | VE            | V5 | R1 | R2 | R3 | R4 | R5 |
| 2016 | TRA3      | Low                  | VC            | V2 | R1 | R2 | R3 | R4 | R5 |
| 2016 | ONT       | Low                  | VE            | V1 | R1 | R2 | R3 | R4 | R5 |

<sup>1</sup>Growth stage based on Figure S1).



**SI Table S15.** Simple effect comparisons of interaction between landscape type and sampling week least squares means for colony weight in prairie project during 2016. Adjustment for multiple comparisons: Tukey-Kramer

| Simple Effect Level | Landscape         | Landscape | Estimate | Standard Error | DF | t Value | Pr >  t | Adj P         |
|---------------------|-------------------|-----------|----------|----------------|----|---------|---------|---------------|
| Week 36             | Agricultural Site | Prairie   | 0.01000  | 2.6561         | 76 | 0.00    | 0.9970  | 0.9970        |
| Week 37             | Agricultural Site | Prairie   | -0.3400  | 2.6561         | 76 | -0.13   | 0.8985  | 0.8985        |
| Week 38             | Agricultural Site | Prairie   | -7.8000  | 2.6561         | 76 | -2.94   | 0.0044  | <b>0.0044</b> |
| Week 39             | Agricultural Site | Prairie   | -8.6400  | 2.6561         | 76 | -3.25   | 0.0017  | <b>0.0017</b> |
| Week 40             | Agricultural Site | Prairie   | -6.9500  | 2.6561         | 76 | -2.62   | 0.0107  | <b>0.0107</b> |

**SI Table S16.** Simple effect comparison of least square means of lipid content in honey bees in prairie and agricultural sites by month.

| Week | Landscape         | Landscape | Estimate | Df | t Value | p-value       |
|------|-------------------|-----------|----------|----|---------|---------------|
| 32   | Agricultural Site | Prairie   | 0.00117  | 30 | 0.41    | 0.6864        |
| 34   | Agricultural Site | Prairie   | 0.00278  | 30 | 0.97    | 0.3394        |
| 36   | Agricultural Site | Prairie   | 0.00393  | 30 | 1.37    | 0.1796        |
| 38   | Agricultural Site | Prairie   | -0.0033  | 30 | -1.15   | 0.2579        |
| 40   | Agricultural Site | Prairie   | -0.00861 | 30 | -3.01   | <b>0.0053</b> |

**SI Table S17.** List of forbs found directly preceding and during the time when our experimental colonies were placed next to reconstructed prairies, as part of the prairie rescue experiment (flowering date data collected 2017). For any given date, (-) denotes present but not in bloom (+) denotes present and in bloom.

| Common Name            | Scientific Name                  | 26-Jul | 1-Aug | 7-Aug | 22-Aug | 7-Sep | 19-Sep |
|------------------------|----------------------------------|--------|-------|-------|--------|-------|--------|
| Culver's Root          | <i>Veronicastrum virginicum</i>  | +      | +     | +     | -      | -     | -      |
| Queen Anne's Lace      | <i>Daucus carota</i>             | +      | +     | +     | +      | -     | -      |
| Rosinweed              | <i>Silphium integrifolium</i>    | +      | +     | +     | +      | +     | -      |
| Canada Goldenrod       | <i>Solidago canadensis</i>       | +      | +     | +     | +      | +     | +      |
| Flowering Spurge       | <i>Euphorbia corollata</i>       | +      | +     | +     | +      | -     | -      |
| White Sweet Clover     | <i>Melilotus albus</i>           | +      | +     | +     | +      | +     | -      |
| Gray-headed Coneflower | <i>Ratibida pinnata</i>          | +      | +     | +     | -      | -     | -      |
| Showy Tick Trefoil     | <i>Desmodium canadense</i>       | +      | +     | +     | +      | +     | -      |
| Slender Mountain Mint  | <i>Pycnanthemum tenuifolium</i>  | +      | +     | +     | +      | -     | -      |
| Red Clover             | <i>Trifolium pratense</i>        | +      | +     | +     | +      | +     | +      |
| Bee Balm               | <i>Monarda fistulosa</i>         | +      | +     | +     | -      | -     | -      |
| Partridge Pea          | <i>Chamaecrista fasciculata</i>  | +      | +     | +     | +      | +     | -      |
| Rattlesnake Master     | <i>Eryngium yuccifolium</i>      | +      | +     | +     | -      | -     | -      |
| Purple Prairie Clover  | <i>Dalea purpurea</i>            | +      | +     | -     | -      | -     | -      |
| Cup Plant              | <i>Silphium perfoliatum</i>      | -      | +     | +     | +      | -     | -      |
| Ironweed               | <i>Vernonia fasciculata</i>      | -      | +     | +     | -      | -     | -      |
| Thistle                | <i>Cirsium</i>                   | -      | -     | -     | +      | +     | +      |
| Sawtooth Sunflower     | <i>Helianthus grosseserratus</i> | -      | -     | -     | -      | +     | +      |
| Stiff Goldenrod        | <i>Solidago rigida</i>           | -      | -     | -     | -      | +     | +      |
| Common Boneset         | <i>Eupatorium perfoliatum</i>    | -      | -     | -     | -      | +     | +      |
| Tall Coreopsis         | <i>Coreopsis tripteris</i>       | -      | -     | -     | -      | +     | -      |
| Heath Aster            | <i>Symphyotrichum ericoides</i>  | -      | -     | -     | -      | +     | +      |
